# Supplementary material for: Characterization and Targeting of Platelet-Derived Growth Factor Receptor alpha (PDGFRA) in Inflammatory Breast Cancer (IBC)
Source: PubMed Central journal article supplement — Neoplasia. 2017 Jun 10;19(7):564–73. doi: 10.1016/j.neo.2017.03.002 (PMC5470553; doi:10.1016/j.neo.2017.03.002), 2017-06-10
Supplement: mmc1.pdf [file mmc1.pdf]

**Supplemental Table 1 : Description of the GIST and breast cancer data sets used for mRNA expression analysis**

| Reference                                          | Type                    | Source of data                                                                                                                                                            | N° of samples in the original publication | N° of arrays used for analysis* | Technological platform       | N° of probe sets |
|----------------------------------------------------|-------------------------|---------------------------------------------------------------------------------------------------------------------------------------------------------------------------|-------------------------------------------|---------------------------------|------------------------------|------------------|
| Ostrowski et al., <i>BMC Cancer</i> 2009           | GIST, learning set      | GEO Db : GSE17743                                                                                                                                                         | 29                                        | 29                              | Affymetrix U133 Plus 2.0     | 54K              |
| Yamaguchi et al., <i>J Clin Oncol.</i> 2008        | GIST, validation set    | GEO Db : GSE8167                                                                                                                                                          | 32                                        | 32                              | Affymetrix U133 Plus 2.0     | 54K              |
| Astolfi et al., <i>Lab Invest.</i> 2010            | GIST, validation set    | GEO Db : GSE20710                                                                                                                                                         | 22                                        | 21                              | Affymetrix U133 Plus 2.0     | 54K              |
| Kang et al., <i>Oncogene</i> 2005                  | GIST, validation set    | <a href="http://www.molpathol.org/data/GIST-arraydata.txt">http://www.molpathol.org/data/GIST-arraydata.txt</a>                                                           | 22                                        | 22                              | Home made (x2 color)         | 19K              |
| Lagarde et al., <i>Clin Cancer Res.</i> 2011       | GIST, validation set    | ArrayExpress Db : E-MTAB-373                                                                                                                                              | 60                                        | 60                              | Agilent                      | 44K              |
| Rink et al., <i>Mol Cancer Ther.</i> 2009          | GIST, validation set    | GEO Db : GSE15966                                                                                                                                                         | 54                                        | 20                              | Agilent                      | 44K              |
| Yang et al., <i>Technol Cancer Res Treat.</i> 2010 | GIST, validation set    | <a href="http://www3.mdanderson.org/~genomics/sarcoma_data_matrix_for_supplemental.zip">http://www3.mdanderson.org/~genomics/sarcoma_data_matrix_for_supplemental.zip</a> | 68                                        | 31                              | Agilent                      | 44K              |
| Arne et al., <i>Int J Cancer</i> 2011              | GIST, validation set    | GEO Db : GSE14755                                                                                                                                                         | 21                                        | 12                              | Swegen                       | 55K              |
| Lee et al., <i>PLoS One</i> 2013                   | GIST, validation set    | GEO Db : GSE47911                                                                                                                                                         | 16                                        | 15                              | Agilent                      | 44K              |
| World IBC Consortium, <i>Clin Cancer Res.</i> 2013 | Breast cancer, test set | GEO Db : GSE22597,<br>ArrayExpress Db : E-MTAB-1547 and E-MTAB-1006                                                                                                       | 389                                       | 389                             | Affymetrix U133 Plus 2.0 / A | 54K/22K          |

\*, samples with available mutational status and *PVRL4* expression
